# Supplementary material
Source: Springer Nature journal article supplement (https://www.springermedizin.de/resource/supplementary/12916_2006_103_MOESM3_ESM.pdf/9599212)
Supplement: MOESM3 [file 9599212]

Outcome adults  
"LBP year" and "LBP ever"

Explanatory variable  
Fat in lumbar multifidus muscles

Possible effect moderators

Gender  
Body mass index  
Physical workload  
Leisure time activity  
Hours spent in sports

Outcome children  
"LBP month" and "LBP year"

Explanatory variable  
Fat in lumbar multifidus muscles

Possible effect moderators

Gender  
Body mass index  
Hours spent in sports  
Daily bicycling
